# Supplementary material for: Preparation and characterization of a novel hybrid hydrogel shell for localized photodynamic therapy
Source: Royal Society of Chemistry journal article supplement (doi:10.1039/c3tb20779j), 2013-01-01
Supplement: c3tb20779j.pdf [file c3tb20779j.pdf]

**Supplementary Information:**

**Preparation and characterization of a novel hybrid hydrogel shell for localized photodynamic therapy**

Yunlong Wang,<sup>a</sup> Bing Han,<sup>a</sup> Ronghua Shi,<sup>b</sup> Le Pan,<sup>a</sup> Hui Zhang,<sup>a</sup> Yuhua Shen, <sup>\*a</sup> Chuanhao Li,<sup>a</sup>  
Fangzhi Huang,<sup>a</sup> and Anjian Xie<sup>\*a</sup>

<sup>a</sup> School of Chemistry and Chemical Engineering, Anhui University, Hefei 230601, P. R. China

<sup>b</sup> School of Life Science, University of Science and Technology of China, Hefei 230026, P. R. China

<sup>\*</sup> Corresponding author Email: s\_yuhua@163.com; anjx@163.com

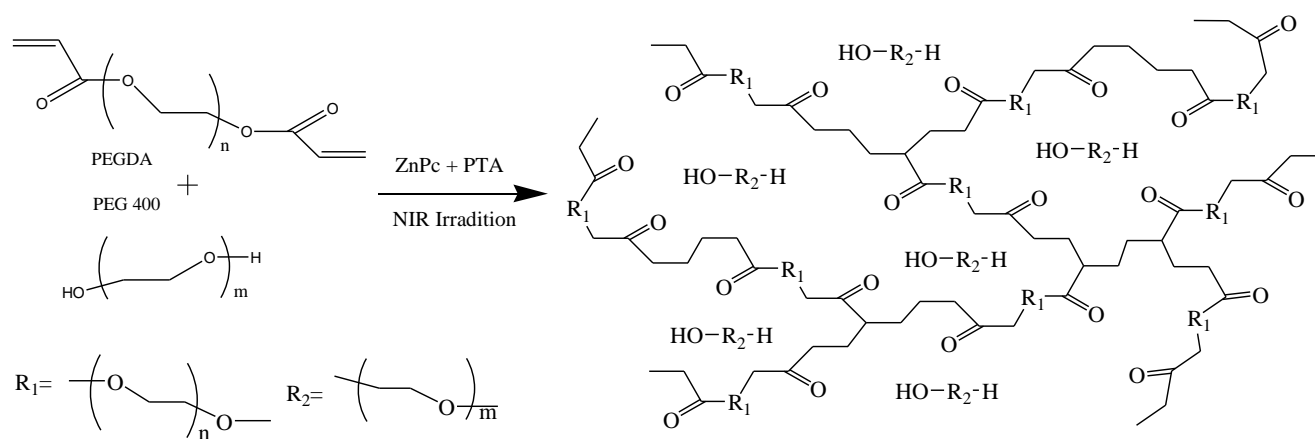

**Fig. S1** Schematic diagram for the cross-linking reaction of precursor

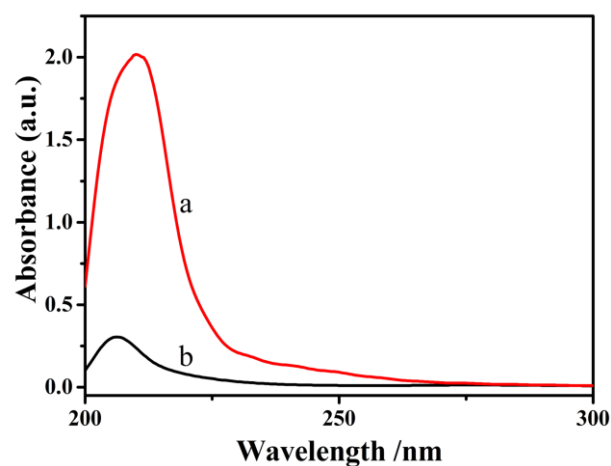

**Fig. S2** UV-Vis absorption spectra of (a) precursor-1 and (b) ZnPc ethanol solution ( $5.77 \times 10^{-4}$  mol/L), showing that the gelation kinetics using absorption peak at 209 nm due to C=C double bond as indexes is reasonable.

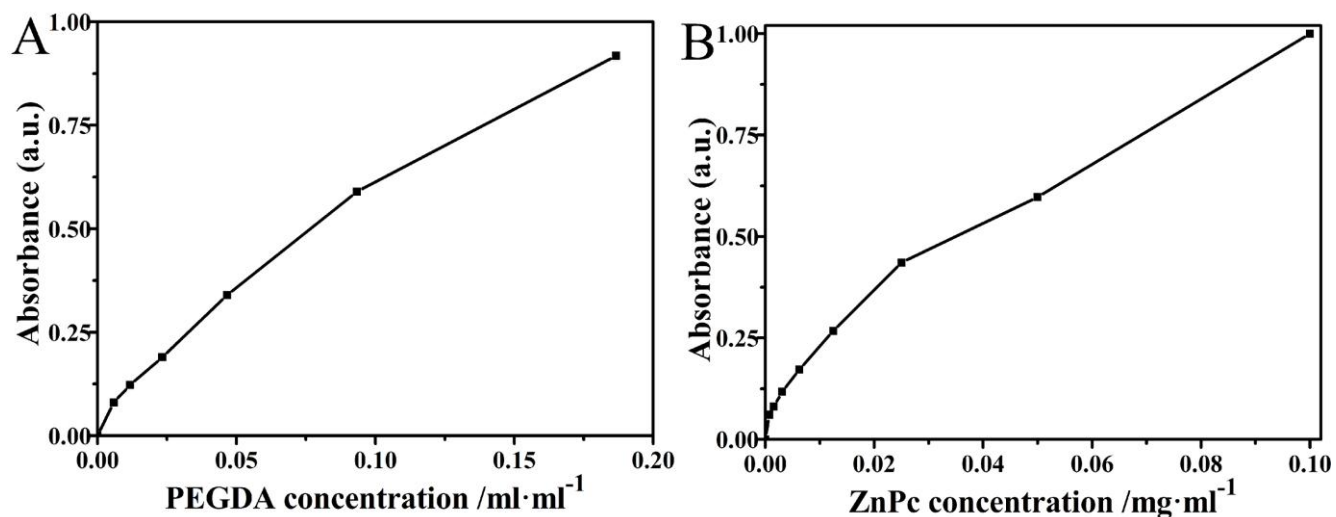

**Fig. S3** Standard concentration-absorbency curve of (A) PEGDA in relation to  $\pi \rightarrow \pi^*$  transition at 209 nm corresponding to C=C double bonds and (B) ZnPc from Q absorption band at 666 nm corresponding to porphyrin ring.

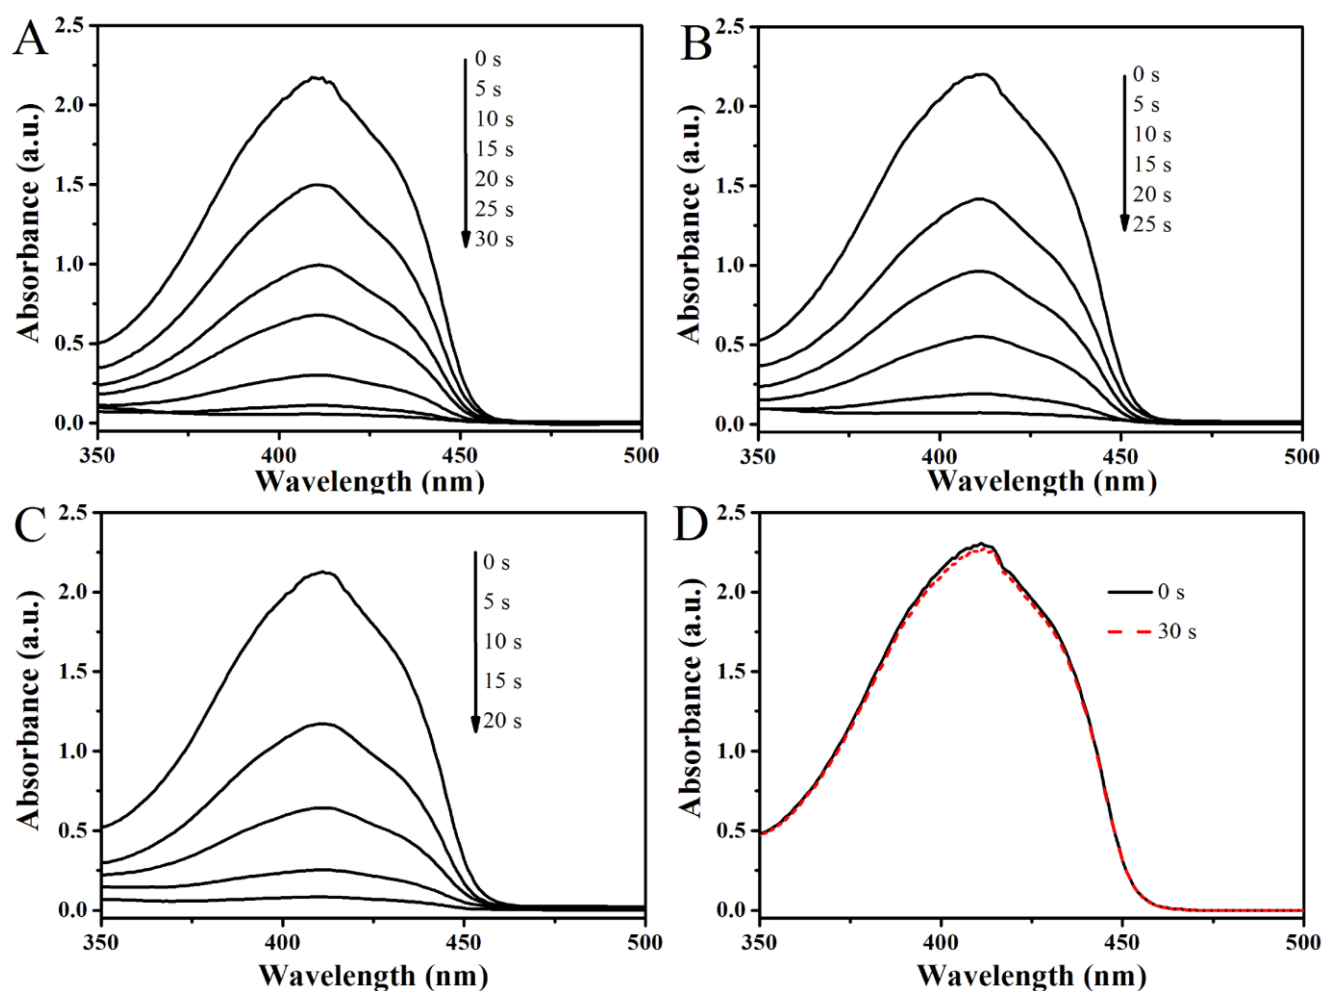

**Fig. S4** Photobleaching of DPBF ( $9.0 \times 10^{-5}$  mol/L) by generation of  $^1\text{O}_2$  in the presence of precursor-1 containing different concentration of PTA: (A) 0.001 mol/L, (B) 0.01 mol/L and (C) 0.1 mol/L, and (D) containing no ZnPc under NIR irradiation.

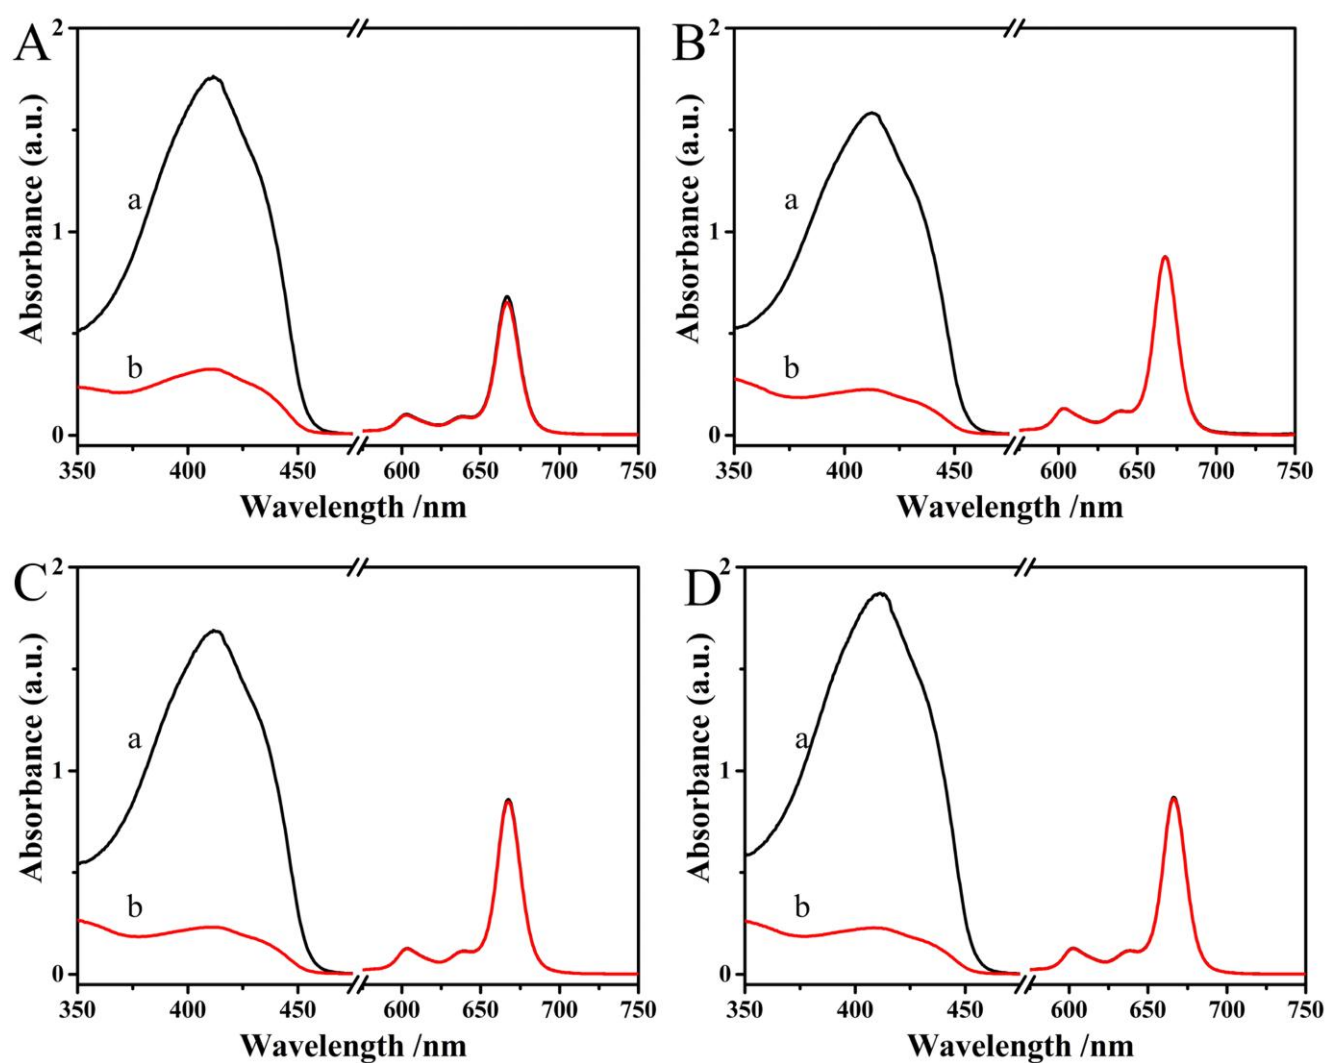

**Fig. S5** UV-Vis absorption spectra for the determination of singlet oxygen quantum yield of (A) precursor-1, (B) precursor-2, (C) precursor-3 and (D) ZnPc in DMF, black line (a) and red line (b) represent before and after irradiation for 5 s, respectively.

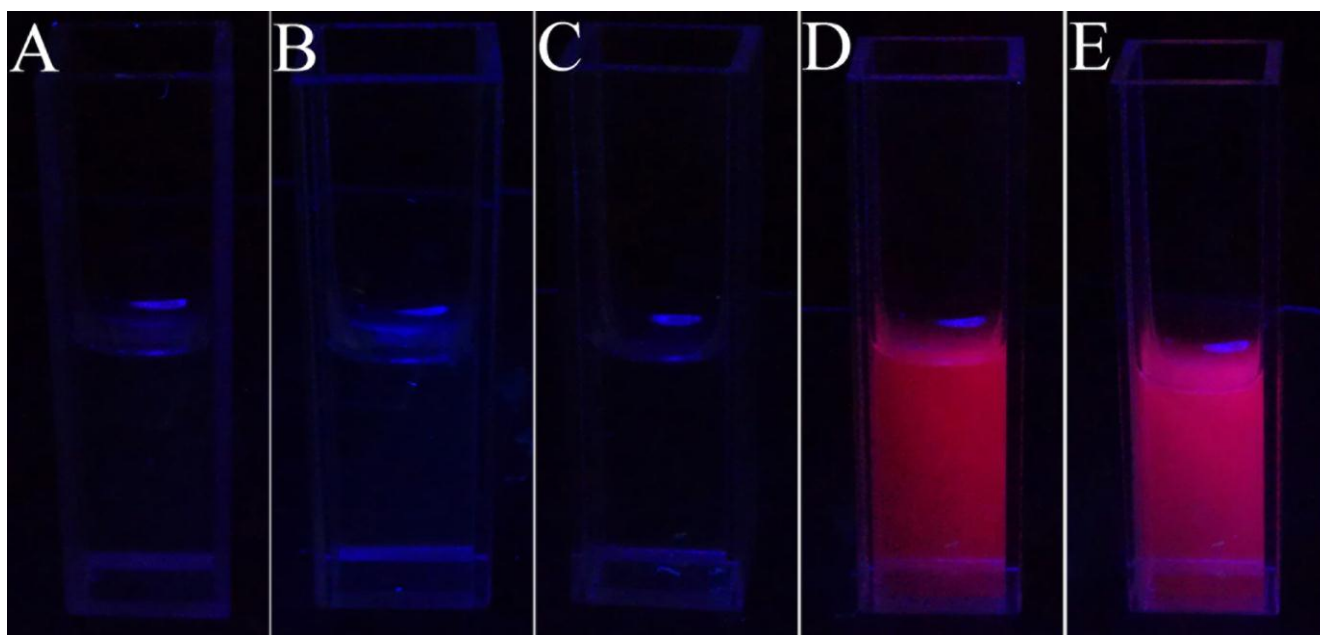

**Fig. S6** Fluorescence images of (A) PEGDA, (B) PEG 400, (C) PTA, (D) ZnPc and (E) precursor-1.
